# Supplementary material for: Aflatoxin B1 Conversion by Black Soldier Fly (Hermetia illucens) Larval Enzyme Extracts
Source: PubMed Central journal article supplement (PMC6784232; doi:10.3390/toxins11090532), 2019-09-12
Supplement: toxins-11-00532-s001.pdf [file toxins-11-00532-s001.pdf]

## Supplementary Materials: Aflatoxin B<sub>1</sub> Conversion by Black Soldier Fly (*Hermetia illucens*) Larval Enzyme Extracts

Nathan Meijer, Geert Stoopen, H.J. van der Fels-Klerx, Joop J.A. van Loon, John Carney and Guido Bosch

**Table 1.** Molar concentrations (nmol/L) of aflatoxin B<sub>1</sub> (AFB<sub>1</sub>) and analyzed metabolites (aflatoxicol (AFL), aflatoxin P<sub>1</sub> (AFP<sub>1</sub>), and aflatoxin M<sub>1</sub> (AFM<sub>1</sub>)) after incubation. Results of individual replicates.

| Treatment                                 | S9 Fraction           | Replicate Number | Concentration (nmol/L) |       |                  |                  |
|-------------------------------------------|-----------------------|------------------|------------------------|-------|------------------|------------------|
|                                           |                       |                  | AFB <sub>1</sub>       | AFL   | AFP <sub>1</sub> | AFM <sub>1</sub> |
| +S9 + AFB <sub>1</sub> ,<br>t = 2h        | BSFL-control          | 1                | 40.26                  | 28.02 | 7.91             | -                |
|                                           |                       | 2                | 29.69                  | 22.05 | 23.30            | -                |
|                                           |                       | 3                | 21.77                  | 12.26 | 42.26            | -                |
|                                           | BSFL-AFB <sub>1</sub> | 1                | 43.45                  | 21.22 | 18.73            | -                |
|                                           |                       | 2                | 37.56                  | 21.98 | 21.75            | -                |
|                                           |                       | 3                | 30.66                  | 22.42 | 26.68            | -                |
|                                           | Rat                   | 1                | 2.97                   | -     | 2.61             | 28.74            |
|                                           |                       | 2                | 3.26                   | -     | 2.74             | 28.94            |
|                                           |                       | 3                | 3.20                   | -     | 2.71             | 30.33            |
| +S9 + AFB <sub>1</sub> ,<br>t = 0 h       | BSFL-control          | 1                | 82.34                  | -     | -                | -                |
|                                           |                       | 2                | 76.31                  | -     | -                | -                |
|                                           |                       | 3                | 76.52                  | -     | -                | -                |
|                                           | BSFL-AFB <sub>1</sub> | 1                | 79.64                  | -     | -                | -                |
|                                           |                       | 2                | 80.71                  | -     | -                | -                |
|                                           |                       | 3                | 75.05                  | -     | -                | -                |
|                                           | Rat                   | 1                | 79.43                  | -     | -                | -                |
|                                           |                       | 2                | 83.60                  | -     | -                | -                |
|                                           |                       | 3                | 83.84                  | -     | -                | -                |
| +S9 - AFB <sub>1</sub> ,<br>t = 2 h       | BSFL-control          | 1                | -                      | -     | -                | -                |
|                                           |                       | 2                | -                      | -     | -                | -                |
|                                           |                       | 3                | -                      | -     | -                | -                |
|                                           | BSFL-AFB <sub>1</sub> | 1                | -                      | -     | -                | -                |
|                                           |                       | 2                | -                      | -     | -                | -                |
|                                           |                       | 3                | -                      | -     | -                | -                |
|                                           | Rat                   | 1                | -                      | -     | -                | -                |
|                                           |                       | 2                | -                      | -     | -                | -                |
|                                           |                       | 3                | -                      | -     | -                | -                |
| -S9 + AFB <sub>1</sub> ,<br>t = 2 h       | N/A                   | 1                | 152.71                 | -     | -                | -                |
|                                           |                       | 2                | 163.06                 | -     | -                | -                |
|                                           |                       | 3                | 157.78                 | -     | -                | -                |
| +S9 + AFB <sub>1</sub> + DMSO,<br>t = 2 h | BSFL-AFB <sub>1</sub> | 1                | 65.30                  | 34.13 | 4.13             | -                |
|                                           |                       | 2                | 63.63                  | 30.26 | 4.88             | -                |
|                                           |                       | 3                | 58.80                  | 32.90 | 5.42             | -                |
|                                           | Rat                   | 1                | 68.79                  | -     | -                | 8.16             |

|                                                        |                             |   |       |       |       |       |
|--------------------------------------------------------|-----------------------------|---|-------|-------|-------|-------|
|                                                        |                             | 2 | 73.68 | -     | -     | 6.84  |
|                                                        |                             | 3 | 71.63 | -     | -     | 7.63  |
| <b>+S9 + AFB<sub>1</sub> + DMSO + PBO,<br/>t = 2 h</b> | <b>BSFL-AFB<sub>1</sub></b> | 1 | 44.99 | 24.15 | 21.18 | -     |
|                                                        |                             | 2 | 45.47 | 18.89 | 23.90 | -     |
|                                                        |                             | 3 | 37.47 | 21.03 | 30.06 | -     |
|                                                        | <b>Rat</b>                  | 1 | 9.88  | -     | 2.60  | 37.60 |
|                                                        |                             | 2 | 8.25  | -     | 2.74  | 36.31 |
|                                                        |                             | 3 | 8.48  | -     | 2.30  | 36.02 |

- denotes that the concentration was below the limit of quantification (LOQ).

**Table 2.** MS/MS parameters.

| <b>Parameter</b>       | <b>Settings</b> |
|------------------------|-----------------|
| Scan type              | MRM             |
| Scheduled MRM          | No              |
| Dwell time             | 5               |
| Resolution Q1          | unit            |
| Resolution Q3          | unit            |
| Settling time          | 5 ms            |
| MR pause               | 5 ms            |
| Curtain gas (CUR)      | 40              |
| Collision gas (CAD)    | Medium          |
| IonSpray voltage (IS)  | 5000 V          |
| Temperature (TEM)      | 400 °C          |
| Ion source gas 1 (GS1) | 50              |
| Ion source gas 2 (GS2) | 50              |

**Table 3.** MS/MS transitions.

| <b>Component</b>   | <b>Q1 (m/z)</b> | <b>Q3 (m/z)</b> | <b>DP (V)</b> | <b>EP (V)</b> | <b>CE (V)</b> | <b>CXP (V)</b> |
|--------------------|-----------------|-----------------|---------------|---------------|---------------|----------------|
| Aflatoxin B1 (ql)  | 313.0           | 128.1           | 40            | 10            | 91            | 10             |
| Aflatoxin B1 (qn)  | 313.0           | 285.2           | 40            | 10            | 33            | 16             |
| Aflatoxicol (qn)   | 297.1           | 269.0           | 66            | 10            | 29            | 16             |
| Aflatoxicol (ql)   | 297.1           | 141.0           | 66            | 10            | 65            | 14             |
| Aflatoxin M1 (qn)  | 328.9           | 272.9           | 61            | 10            | 33            | 18             |
| Aflatoxin M1 (ql)  | 328.9           | 229.0           | 61            | 10            | 55            | 16             |
| Aflatoxin P1 (qn)  | 299.0           | 271.0           | 101           | 10            | 33            | 18             |
| Aflatoxin P1 (ql)  | 299.0           | 114.9           | 101           | 10            | 71            | 12             |
| Aflatoxin Q1 (qn)  | 329.1           | 310.8           | 71            | 10            | 29            | 16             |
| Aflatoxin Q1 (ql)  | 329.1           | 177.0           | 71            | 10            | 45            | 22             |
| 13C17-Aflatoxin B1 | 330.1           | 301.1           | 40            | 10            | 33            | 16             |
| 13C17-Aflatoxin M1 | 346.1           | 288.1           | 61            | 10            | 33            | 18             |
| Aflatoxin B2 (qn)  | 315.1           | 287.2           | 40            | 10            | 37            | 18             |
| Aflatoxin B2 (ql)  | 315.1           | 259.2           | 40            | 10            | 43            | 18             |
| 13C17-Aflatoxin B2 | 332.1           | 303.1           | 40            | 10            | 37            | 18             |
| Aflatoxin G1 (qn)  | 329.0           | 243.2           | 40            | 10            | 39            | 14             |
| Aflatoxin G1 (ql)  | 329.0           | 200.0           | 40            | 10            | 53            | 12             |
| 13C17-Aflatoxin G1 | 346.1           | 257.1           | 40            | 10            | 39            | 14             |
| Aflatoxin G2 (qn)  | 331.1           | 313.2           | 40            | 10            | 35            | 18             |

|                                             |       |       |    |    |    |    |
|---------------------------------------------|-------|-------|----|----|----|----|
| Aflatoxin G2 (ql)                           | 331.1 | 245.2 | 40 | 10 | 43 | 14 |
| <sup>13</sup> C <sup>17</sup> -Aflatoxin G2 | 348.1 | 259.1 | 40 | 10 | 43 | 14 |

Table 4. LOQs of analyzed compounds.

| Compound     | LOQ (ng/mL) |
|--------------|-------------|
| Aflatoxin B1 | 0.25        |
| Aflatoxin B2 | 10          |
| Aflatoxin P1 | 5           |
| Aflatoxin Q1 | 5           |
| Aflatoxin M1 | 0.125       |
| Aflatoxicol  | 1.25        |
| Aflatoxin G1 | 0.125       |
| Aflatoxin G2 | 0.125       |

Table 5. LC-MS/MS parameters.

| Parameter                                 | Settings                                                        |
|-------------------------------------------|-----------------------------------------------------------------|
| Sample temperature                        | 10 °C                                                           |
| Temperature column                        | 35 °C                                                           |
| Injection volume                          | 5 µL                                                            |
| Mobile phase (A)                          | 1 mM ammonium formate and 1% formic acid in water               |
| Mobile phase (B)                          | 1 mM ammonium formate and 1% formic acid in methanol:water—95:5 |
| LC flow rate                              | 400 µL/min                                                      |
| Electrospray ionization (ESI) temperature | 400 °C                                                          |
| ESI spray voltage                         | 5.0 kV                                                          |
| Ion source gas 1 (GS1)                    | 50                                                              |
| Ion source gas 2 (GS2)                    | 50                                                              |
